# Supplementary material for: Paclitaxel Potentiates the Anticancer Effect of Cetuximab by Enhancing Antibody-Dependent Cellular Cytotoxicity on Oral Squamous Cell Carcinoma Cells In Vitro
Source: PubMed Central journal article supplement (PMC7503545; doi:10.3390/ijms21176292), 2020-08-31
Supplement: ijms-21-06292-s001.pdf [file ijms-21-06292-s001.pdf]

**Table S1.** STR analysis.

**A.**

| <b>Sample Name</b> | <b>Marker</b> | <b>Allele1</b> | <b>Allele2</b> |
|--------------------|---------------|----------------|----------------|
| A431               | AMEL          | X              |                |
| A431               | CSF1PO        | 11             | 12             |
| A431               | D13S317       | 9              | 13             |
| A431               | D16S539       | 12             | 14             |
| A431               | D21S11        | 28             |                |
| A431               | D5S818        | 12             | 13             |
| A431               | D7S820        | 10             |                |
| A431               | TH01          | 9              |                |
| A431               | TPOX          | 11             |                |
| A431               | vWA           | 15             | 17             |

**B.**

| <b>Sample Name</b> | <b>Marker</b> | <b>Allele1</b> | <b>Allele2</b> |
|--------------------|---------------|----------------|----------------|
| HSC-4              | AMEL          | X              |                |
| HSC-4              | CSF1PO        | 9              | 10             |
| HSC-4              | D13S317       | 8              | 13             |
| HSC-4              | D16S539       | 12             |                |
| HSC-4              | D21S11        | 29             | 30             |
| HSC-4              | D5S818        | 8              | 11             |
| HSC-4              | D7S820        | 9              | 10             |
| HSC-4              | TH01          | 6              | 9              |
| HSC-4              | TPOX          | 11             |                |
| HSC-4              | vWA           | 16             | 19             |

**C.**

| <b>Sample Name</b> | <b>Marker</b> | <b>Allele1</b> | <b>Allele2</b> |
|--------------------|---------------|----------------|----------------|
| OSC-19             | AMEL          | X              | Y              |
| OSC-19             | CSF1PO        | 12             |                |
| OSC-19             | D13S317       | 12             |                |
| OSC-19             | D16S539       | 9              | 12             |
| OSC-19             | D21S11        | 21             |                |
| OSC-19             | D5S818        | 10             | 13             |
| OSC-19             | D7S820        | 9              | 11             |
| OSC-19             | TH01          | 9              |                |
| OSC-19             | TPOX          | 11             |                |
| OSC-19             | vWA           | 14             |                |

**Table S2.** Evaluation value.

|       | <b>A431</b> | <b>HSC4</b> | <b>OSC19</b> |
|-------|-------------|-------------|--------------|
| A431  | -           | 0.333       | 0.370        |
| HSC4  | -           | -           | 0.276        |
| OSC19 | -           | -           | -            |

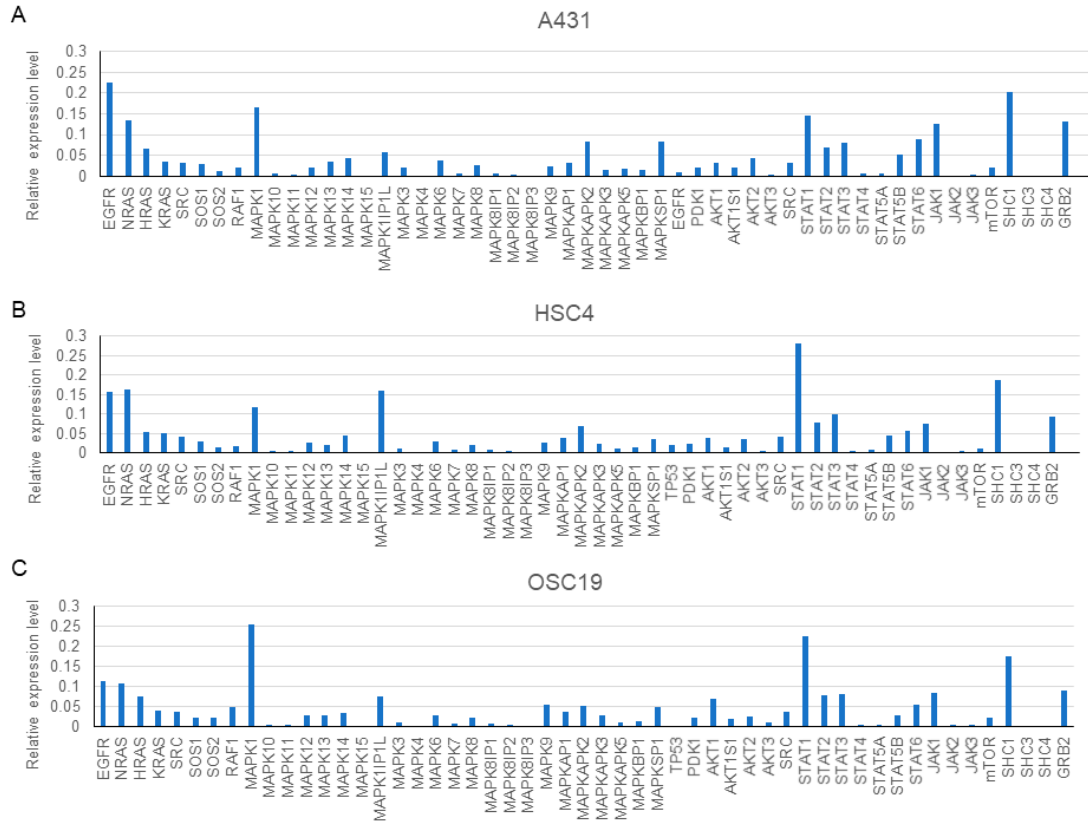

**Figure S1A, S1B, S1C:** Expression levels of various genes closely related to EGFR signaling analyzed with microarray. The expression levels of each genes closely related to EGFR signaling were indicated. Values were calculated the relative expression to the expression level of GAPDH as a house-keeping gene. (A) A431, (B) HSC4, (C) OSC19.
